# Supplementary material
Source: bioRxiv or medRxiv preprint supplement (https://www.biorxiv.org/highwire/filestream/75502/field_highwire_adjunct_files/2/245332-3.pdf)
Supplement: Supplementary file [file 245332-3.pdf]

## KEY RESOURCES TABLE

| REAGENT or RESOURCE                                                             | SOURCE                   | IDENTIFIER    |
|---------------------------------------------------------------------------------|--------------------------|---------------|
| <b>Antibodies</b>                                                               |                          |               |
| Mouse monoclonal anti-PPAR $\gamma$ (E-8)                                       | Santa Cruz Biotechnology | Cat# sc-7273  |
| Rabbit polyclonal anti-PPAR $\gamma$ 2                                          | Abcam                    | Cat# ab45036  |
| Rabbit polyclonal anti-PPARG (81B8)                                             | Cell Signaling           | Cat #2443     |
| Rabbit polyclonal anti-C/EBP $\beta$ (C-19)                                     | Santa Cruz Biotechnology | Cat# sc-150   |
| Rabbit polyclonal anti-C/EBP $\alpha$                                           | Santa Cruz Biotechnology | Cat# sc61     |
| Rabbit polyclonal anti-FABP4                                                    | Abcam                    | Cat# ab13979  |
| Goat polyclonal anti-FABP4                                                      | R & D Systems            | Cat # AF1443  |
| Mouse monoclonal anti-Adiponectin                                               | Abcam                    | Cat# ab22554  |
| Rabbit polyclonal anti-GFP                                                      | Abcam                    | Cat# ab290    |
| Goat polyclonal anti-Glut4                                                      | Santa Cruz Biotechnology | Cat # sc-1608 |
| Horseradish peroxidase (HRP)-conjugated anti-mouse                              | Cell Signaling           | Cat# 7076     |
| horseradish peroxidase (HRP)-conjugated anti-rabbit                             | Cell Signaling           | Cat# 7074     |
| Goat anti- Rabbit IgG (H+L) cross-adsorbed secondary antibody, alexa Fluor 514  | Invitrogen               | Cat #A 31558  |
| Goat anti- Mouse IgG (H+L) cross-adsorbed secondary antibody, Alexa Fluor 594   | Invitrogen               | Cat # A11032  |
| Donkey anti- Mouse IgG (H+L) cross-adsorbed secondary antibody, Alexa Fluor 647 | Invitrogen               | Cat # A31571  |
| <b>Chemicals, Peptides, and Recombinant Proteins</b>                            |                          |               |
| IBMX                                                                            | Sigma-Aldrich            | Cat # 7018    |
| Dexamethasone                                                                   | Sigma-Aldrich            | Cat #D1756    |
| Insulin                                                                         | Sigma-Aldrich            | Cat # 16634   |
| Saponin                                                                         | Sigma-Aldrich            | Cat #47036    |
| bovine serum albumin                                                            | Sigma-Aldrich            | Cat #7906     |
| Corticosterone                                                                  | Sigma-Aldrich            | Cat #174      |
| Rosiglitazone                                                                   | Cayman                   | Cat #7906     |
| BODIPY                                                                          | Molecular Probes         | Cat #D-3922   |
| <b>Experimental Models: Cell Lines</b>                                          |                          |               |
| OP9 mouse stromal                                                               | Wolins et al., 2006      | N/A           |
| 3T3-L1 mouse preadipocytes cell line                                            | Green and Kehinde, 1975  | N/A           |
| 3T3-F442A mouse preadipocytes cell line                                         | Green and Kehinde, 1975  |               |
| <b>Experimental Models: Organisms/Strains</b>                                   |                          |               |
| Mouse                                                                           | Jackson Labs             | C57/BI6       |
| <b>Oligonucleotides</b>                                                         |                          |               |

|                                            |                   |                                                             |
|--------------------------------------------|-------------------|-------------------------------------------------------------|
| See Tables S1-S6 below                     |                   |                                                             |
| <b>Recombinant DNA</b>                     |                   |                                                             |
| Plasmid: CEBPB_Citrine_homology_donor      | This paper        | N/A                                                         |
| Plasmid: PPARG_Citrine_homology_donor      | This paper        | N/A                                                         |
| Plasmid: pX330-U6-Chimeric_BB-CBh-hSpCas9  | Cong et al., 2013 | Addgene plasmid # 42230                                     |
| Plasmid: pX335-U6-Chimeric_BB-CBh-hSpCas9n | Cong et al., 2013 | Addgene plasmid # 42335                                     |
| Plasmid: mcherry                           | This paper        | N/A                                                         |
| Plasmid: mcherry-FABP4                     | This paper        | N/A                                                         |
| <b>Other</b>                               |                   |                                                             |
| Zhang lab web tool for designing sgRNA     |                   | <a href="http://crispr.mit.edu/">http://crispr.mit.edu/</a> |
|                                            |                   |                                                             |

| Target        | Strand | Oligonucleotide<br>(5' to 3')      | sequence |
|---------------|--------|------------------------------------|----------|
| PPARG_Nterm_1 | Top    | <u>CACCG</u> GAGATTTGCTGTAATTCACAC |          |
| PPARG_Nterm_1 | Bottom | <u>AAACG</u> TGTGAATTACAGCAAATCTC  |          |
| PPARG_Nterm_2 | Top    | <u>CACCG</u> CTGTTATGGGTGAAACTCT   |          |
| PPARG_Nterm_2 | Bottom | <u>AAAC</u> AGAGTTTCACCCATAACAGC   |          |
| CEBPB_Nterm   | Top    | <u>CACCG</u> CGCGTTCATGCACCGCCTGC  |          |
| CEBPB_Nterm   | Bottom | <u>AAAC</u> GCAGGCGGTGCATGAACGCGC  |          |

**Table S1: Oligonucleotide sequences used to insert sgRNA sequences into the px335 or px330 expression vector.** Guide sequences are targeted to the PPARG and CEBPB N-terminal. The underlined and italicized nucleotides denote the overhang for ligation of the oligonucleotide duplex into the px335 or px330 guide sequence insertion site.

| Primer Name                | Template        | Primer sequence<br>(5' to 3')                                      |
|----------------------------|-----------------|--------------------------------------------------------------------|
| PPARG_homology_region1_FWD | OP9 genomic DNA | AACCAATTCAGTCGACTGGATCCA<br>AGGCCTTAAGCAAGAAGCC                    |
| PPARG_homology_region1_REV | OP9 genomic DNA | ACAGCTCCTCGCCCTTGCTCACCA<br>TGGTAAGAACAGCATAAAACAGAG<br>ATTTGCTGTA |
| PPARG_homology_region2_FWD | OP9 genomic DNA | CGAGCTGTACAAGGGAGGAGGAG<br>GTGAAACTCTGGGAGATTCTCC                  |
| PPARG_homology_region2_REV | OP9 genomic DNA | ATCTCGAGTGCGGCCGCGAATTC<br>GAAATAGAGAATGCAACAT                     |
| PPARG_Citrine_FWD          | Citrine plasmid | TACAGCAAATCTCTGTTTTATGCTG<br>TTCTTACCATGGTGAGCAAGGGCG<br>AGGAGCTGT |
| PPARG_Citrine_REV          | Citrine plasmid | CTTGTACAGCTCGTCCATGCCGA                                            |
| CEBPB_homology_region1_FWD | OP9 genomic DNA | AACCAATTCAGTCGACTGCGTTTG<br>TCTCTGATGAC                            |
| CEBPB_homology_region1_REV | OP9 genomic DNA | ATGGTGGCGAACGCGGGGCC                                               |
| CEBPB_homology_region2_FWD | OP9 genomic DNA | AGGAGGACACCGCCTGCTG                                                |
| CEBPB_homology_region2_REV | OP9 genomic DNA | TCGAGTGCGGCCGCGACCTTCTTC<br>TGC                                    |
| CEBPB_Citrine_FWD          | Citrine plasmid | CGCGTTCGCCACCATGGTGAGCA<br>AGGGCGA                                 |
| CEBPB_Citrine_REV          | Citrine plasmid | AGGCGGTGTCCTCCTCCCTTGAC<br>AGCTCGTC                                |

**Table S2: Primers used for PCR amplification of fragments that were joined by Gibson assembly to create donor vectors to insert Citrine at the N-terminals of PPARG and CEBPB via homologous recombination.**

| <b>Assay</b>                       | <b>Primer sequence (5' to 3')</b>           | <b>Amplicon (bp)</b>          |
|------------------------------------|---------------------------------------------|-------------------------------|
| genotyping<br>PPARG Citrine clones | <b>FWD:</b> CAC AGA ACA GTG AAT GTG TGG GTC | <b>630</b> (wt allele)        |
|                                    | <b>REV:</b> GGA AAT GGA AGC CAT GAG CAG     | <b>1347</b> (knock-in allele) |
| genotyping CEBPB<br>Citrine clones | <b>FWD:</b> CTT ATA AAC CTC CCG CTC GGC     | <b>360</b> (wt allele)        |
|                                    | <b>REV:</b> AAG AGG TCG GAG AGG AAG TCG T   | <b>1077</b> (knock-in allele) |

**Table S3: Primers used for genomic PCR analysis of the PPARG and CEBPB CRISPR clones.**

| <b>Assay</b>                   | <b>Primer sequence (5' to 3')</b>           | <b>Amplicon (bp)</b>         |
|--------------------------------|---------------------------------------------|------------------------------|
| seq. 1<br>PPARG Citrine clones | <b>FWD:</b> CAC AGA ACA GTG AAT GTG TGG GTC | - (wt allele)                |
|                                | <b>REV:</b> CTT CAG CTC GAT GCG GTT CA      | <b>717</b> (knock-in allele) |
| seq. 2<br>PPARG Citrine clones | <b>FWD:</b> CAA GGA GGA CGG CAA CAT C       | - (wt allele)                |
|                                | <b>REV:</b> GGA AAT GGA AGC CAT GAG CAG     | <b>650</b> (knock-in allele) |
| seq. 1<br>CEBPB Citrine clones | <b>FWD:</b> CTT ATA AAC CTC CCG CTC GGC     | - (wt allele)                |
|                                | <b>REV:</b> CTT CAG CTC GAT GCG GTT CA      | <b>475</b> (knock-in allele) |
| seq. 2<br>CEBPB Citrine clones | <b>FWD:</b> CAA GGA GGA CGG CAA CAT C       | - (wt allele)                |
|                                | <b>REV:</b> AAG AGG TCG GAG AGG AAG TCG T   | <b>603</b> (knock-in allele) |

**Table S4: Primers used for genomic PCR analysis to verify the fluorophore integration sites of the PPARG and CEBPB tagged clones.**

| <b>Primer Name</b> | <b>Primer sequence<br/>(5' to 3')</b> |
|--------------------|---------------------------------------|
| Citrine_probe_FWD  | CGACGTAAACGGCCACAAGTT                 |
| Citrine_probe_REV  | ATGGGGGTGTTCTGCTGGTAGT                |

**Table S5: Primers used for the PCR amplification of a 504 bp probe directed towards Citrine.**
